# Supplementary material
Source: PubMed Central journal article supplement (PMC7689939)
Supplement: ao0c04522_si_001.pdf [file ao0c04522_si_001.pdf]

Supporting Information

**Reagentless Amperometric Pyruvate Biosensor Based on a Prussian Blue-  
and Enzyme Nanoparticle-Modified Screen-Printed Carbon Electrode**

Dinakaran Thirumalai,<sup>†</sup> Seonghye Kim,<sup>‡</sup> Suhkmann Kim,<sup>\*,‡</sup> and Seung-Cheol Chang<sup>\*,†</sup>

<sup>†</sup>*Department of Cogno-Mechatronics Engineering, Department of Optics and Mechatronics Engineering,  
College of Nanoscience and Nanotechnology, Pusan National University, Busan 46241, Republic of  
Korea*

<sup>‡</sup>*Department of Chemistry, Chemistry Institute for Functional Materials, Sustainable Utilization of  
Photovoltaic Energy Research Center, Pusan National University, Busan, 46241, Republic of Korea*

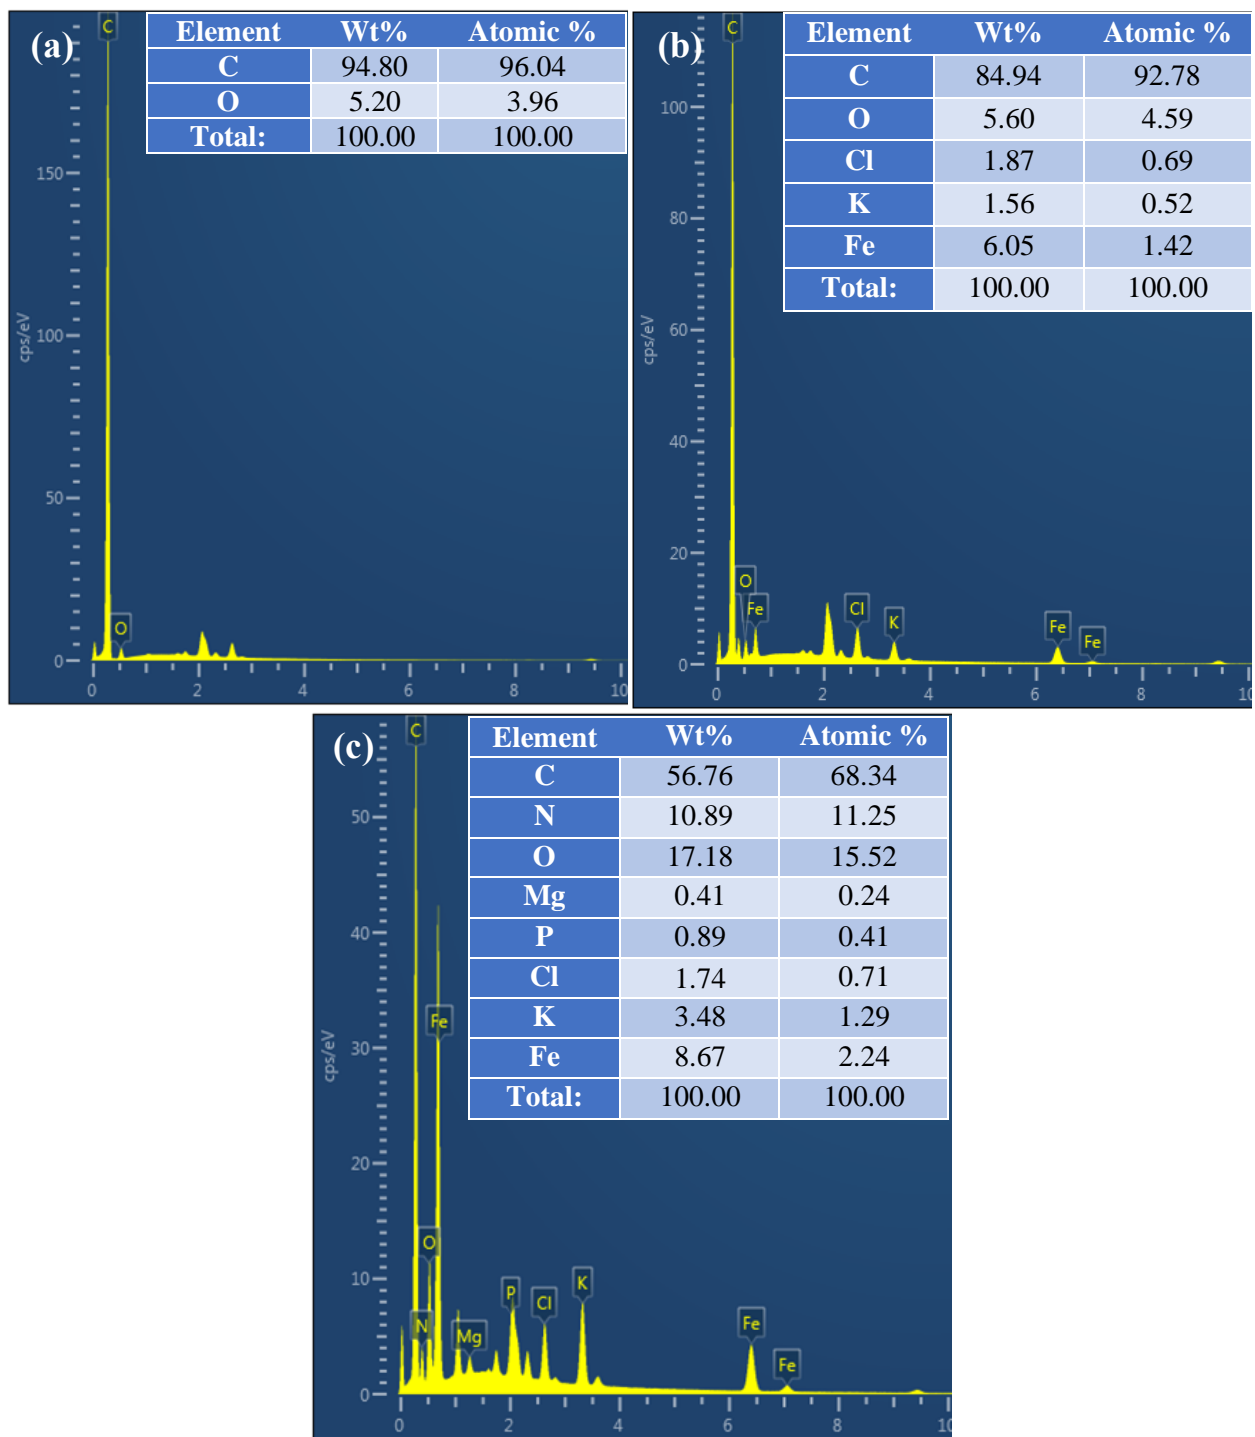

**Figure S1.** EDS spectrum analysis of (a) Bare SPCE, (b) PB/SPCE, and (c) PoxBNPs/PB/SPCE.

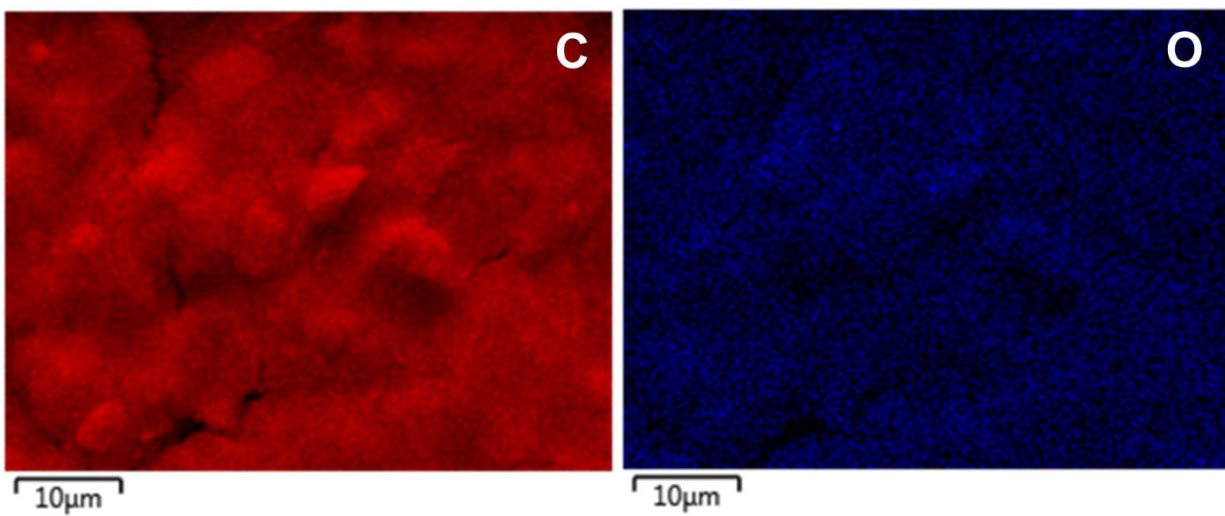

**Figure S2.** EDS elemental mapping of Bare SPCE.

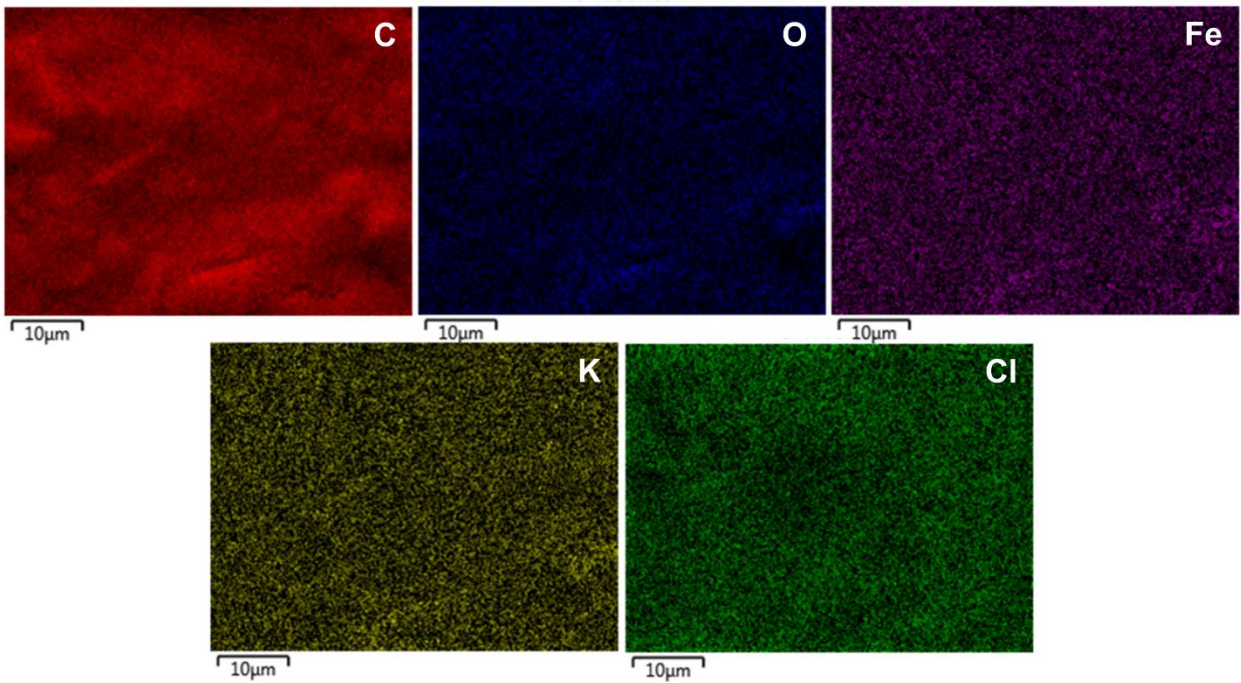

**Figure S3.** EDS elemental mapping of PB/SPCE.

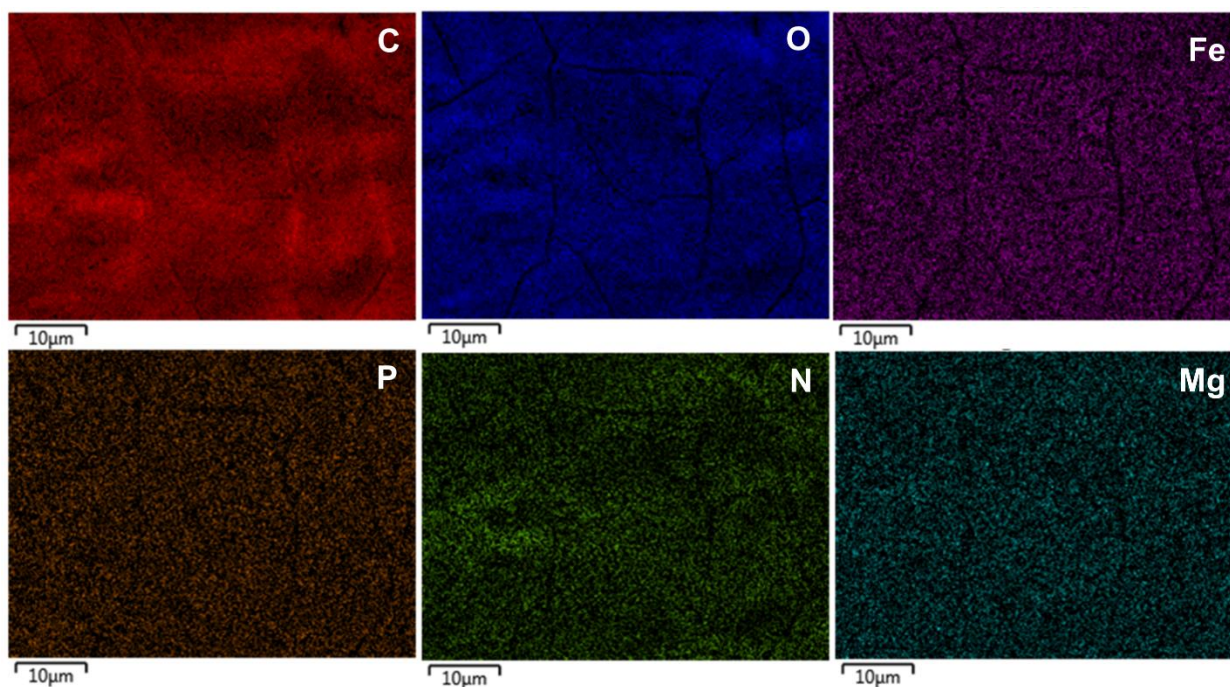

**Figure S4.** EDS elemental mapping of PoxBNPs/PB/SPCE.

**Table S1.** A comparison of various analytical parameters of amperometric Py biosensors

| Composition of electrode                                            | Method of immobilization | Reagent     | Working potential (V) vs. Ag/AgCl | Dynamic linear range ( $\mu\text{M}$ ) | LOD ( $\mu\text{M}$ ) | Sensitivity ( $\mu\text{A mM}^{-1} \text{cm}^{-2}$ ) | Ref.          |
|---------------------------------------------------------------------|--------------------------|-------------|-----------------------------------|----------------------------------------|-----------------------|------------------------------------------------------|---------------|
| PoxB/Polytyramine/platinized glassy carbon electrode                | Covalent                 | Reagent     | +0.65                             | 100–3000                               | 50                    | 6.0                                                  | S1            |
| PoxB/conducting polymer-modified electrode                          | Covalent                 | Reagentless | +0.10 vs. SCE                     | 0–2500                                 | 100                   | 0.028                                                | S2            |
| PoxB/3-mercaptopropionic acid and 6-aminocaproic acid/ Au electrode | Cross-linking            | Reagent     | +0.03                             | 1.0–10                                 | 0.56                  | -                                                    | S3            |
| PoxBNPs/Au electrode                                                | Covalent                 | Reagent     | +0.28                             | 0.01–5000                              | 0.67                  | -                                                    | S4            |
| PoxBNPs/pencil graphite electrode                                   | Adsorption               | Reagent     | +0.10                             | 0.001–6000                             | 0.58                  | -                                                    | S5            |
| PoxBNPs/PB/SPCE                                                     | Adsorption               | Reagentless | -0.10                             | 10–100                                 | 0.91                  | 40.8                                                 | Present study |

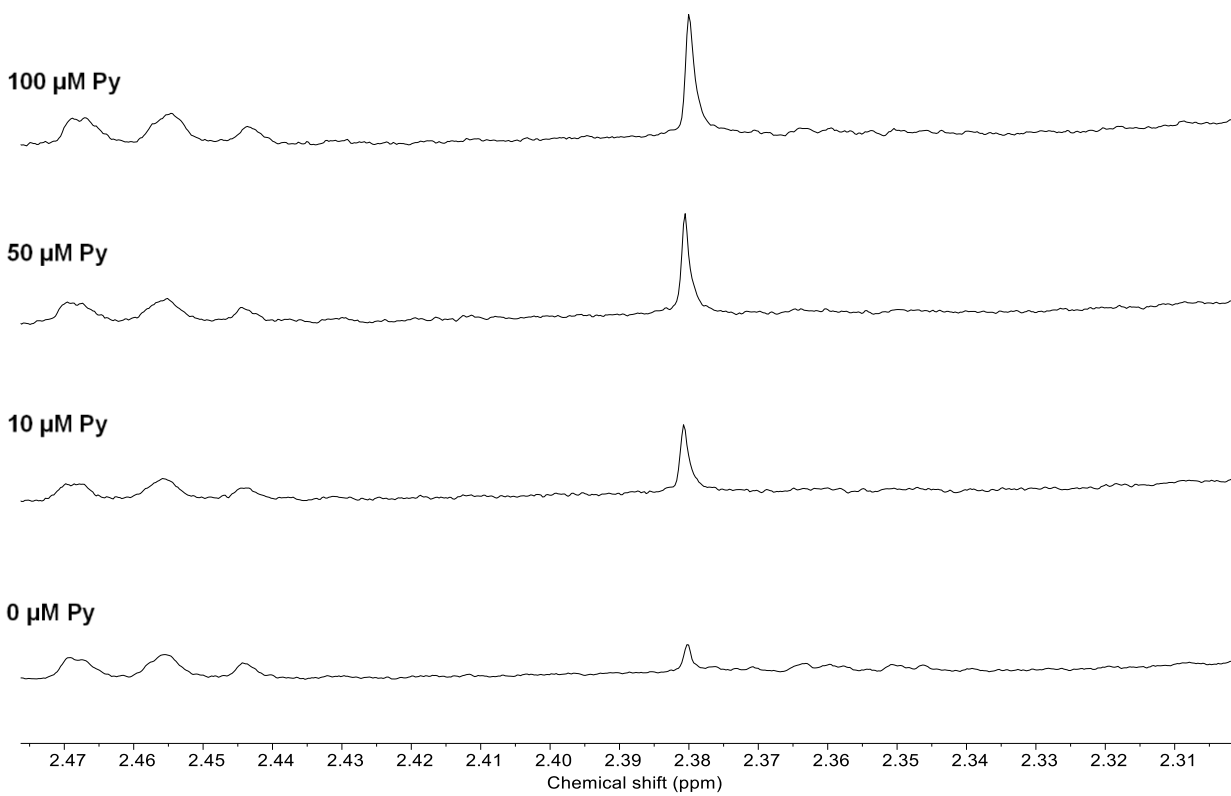

**Figure S5.** <sup>1</sup>H NMR spectrum of spiking experiment. The single resonance at 2.38 ppm was the Py. This resonance increased depending on spiked concentration of Py.

## References

- (S1) Situmorang, M.; Gooding, J. J.; Hibbert, D. B.; Barnett, D. The development of a pyruvate biosensor using electrodeposited polytyramine. *Electroanalysis* **2002**, *14*, 17–21.
- (S2) Dang, L. A.; Haccoun, J.; Piro, B.; Pham, M. C. Reagentless recycling of pyruvate oxidase on a conducting polymer-modified electrode. *Electrochimica Acta* **2006**, *51*, 3934–3943.
- (S3) Bayram, E.; Akyilmaz, E. A new pyruvate oxidase biosensor based on 3-mercaptopropionic acid/6-aminocaproic acid modified gold electrode. *Artif. Cells Nanomed. Biotechnol.* **2014**, *42*, 418–422.
- (S4) Malik, M.; Chaudhary, R.; Pundir, C. S. An improved enzyme nanoparticles based amperometric pyruvate biosensor for detection of pyruvate in serum. *Enzyme Microb. Technol.* **2019**, *123*, 30–38.
- (S5) Malik, M.; Chaudhary, R.; Pundir, C. S. An amperometric pyruvate biosensor based on pyruvate oxidase nanoparticles immobilized onto pencil graphite electrode. *Process Biochem.* **2020**, *93*, 12–20.
